# Supplementary material for: Fibrotic scar after experimental autoimmune encephalomyelitis inhibits oligodendrocyte differentiation
Source: PubMed Central journal article supplement — Neurobiol Dis. Author manuscript; Available in PMC 2020 Oct 10. (PMC7547849; doi:10.1016/j.nbd.2019.104674), 2019-11-12
Supplement: NIHMS1634791-supplement-supplementary.pdf [file NIHMS1634791-supplement-supplementary.pdf]

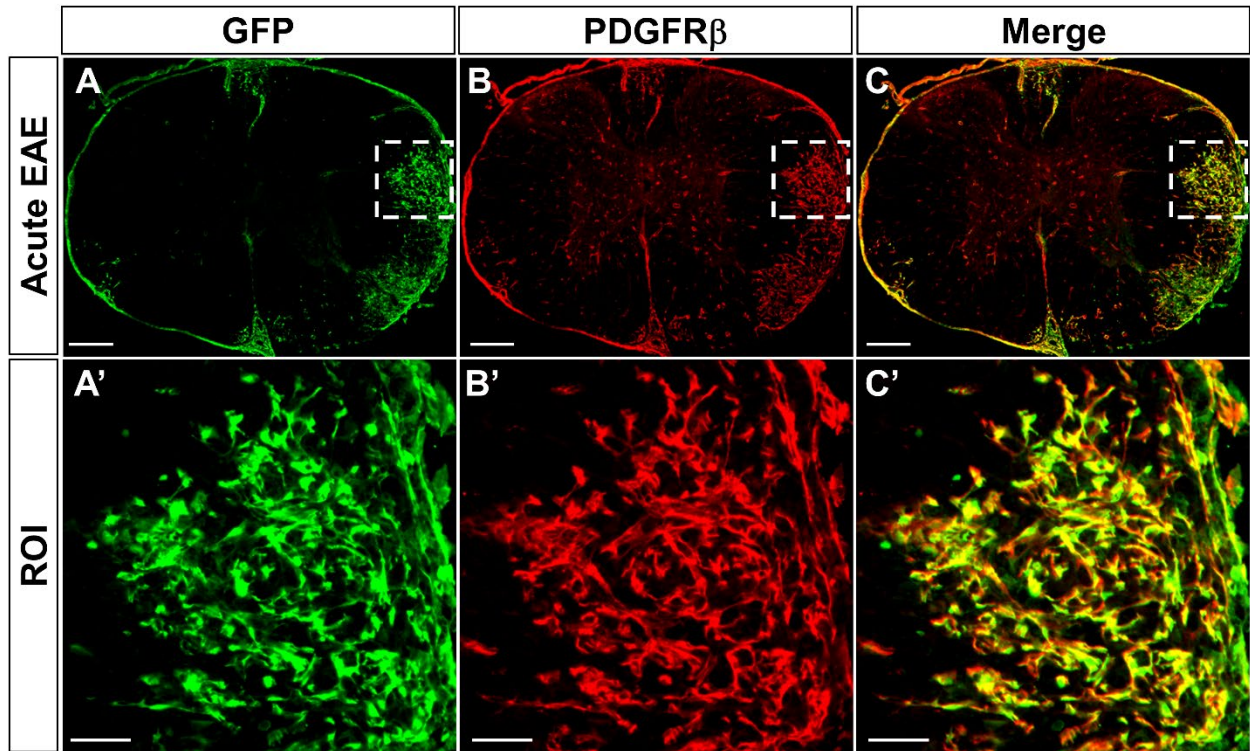

**Supplementary Figure 1.** Col1 $\alpha$ 1<sup>GFP</sup> fibroblasts in EAE lesions are PDGFR $\beta$  positive. Infiltrating Col1 $\alpha$ 1<sup>GFP</sup> fibroblasts colocalize with PDGFR $\beta$  immunostaining in the thoracic spinal cord during the acute phase of EAE. We had previously identified PDGFR $\beta$  as a marker of perivascular fibroblasts after spinal cord injury (Soderblom et al., 2013). Scale bars = 200 $\mu$ m (A-C) and 50 $\mu$ m (A'-B').

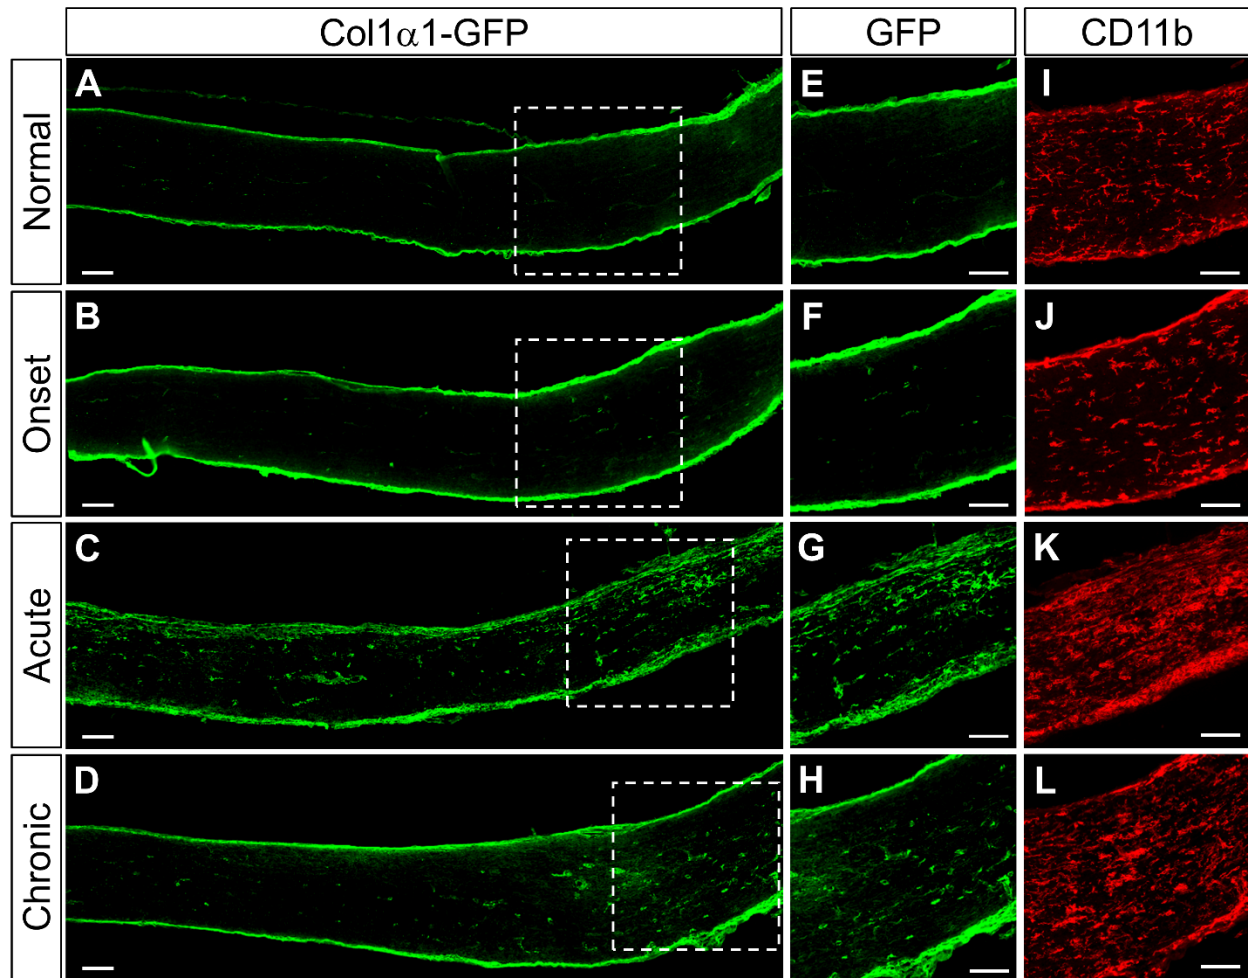

**Supplementary Figure 2.** Fibroblast activation also occurs in the optic nerve after EAE. Similar to the spinal cord, the optic nerve from a normal Col1 $\alpha$ 1<sup>GFP</sup> mouse shows fibroblasts in the meninges and around blood vessels (A, E). Fibroblasts appear normal at disease onset (B, F) and become reactive during acute disease (C, G) corresponding to an increase in CD11b<sup>+</sup> macrophages/microglia (I-K). Fibroblast activation resolves chronically but not to normal levels (D, H). Scale bars = 100 $\mu$ m.

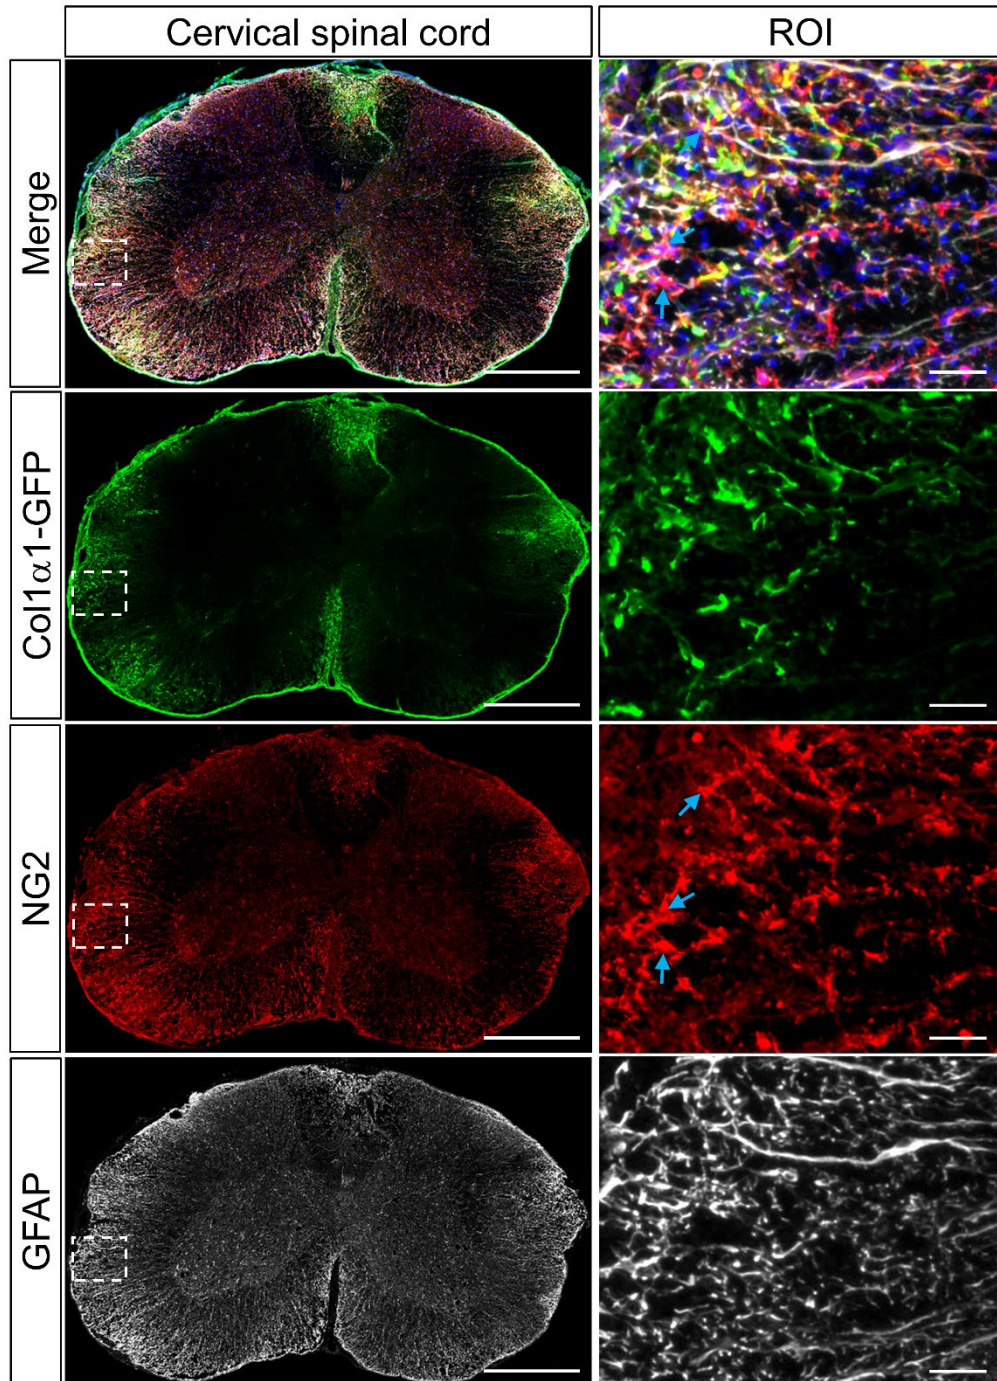

**Supplementary Figure 3.** OPCs and astrocytes are present in fibrotic regions after EAE. GFAP<sup>+</sup> astrocytes and NG2<sup>+</sup> OPCs (arrows) are present in areas with Col1α1<sup>GFP</sup> fibroblasts in EAE lesions. Region of interest (ROI) is denoted by boxed regions. Scale bars = 500μm and 50μm (ROI).

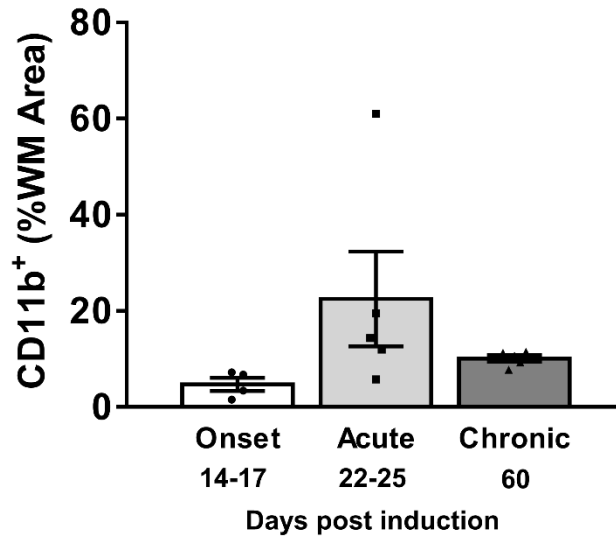

**Supplementary Figure 4.** Macrophage infiltration is reduced chronically after EAE. The percent of white matter that has a dense accumulation of CD11b<sup>+</sup> macrophages increases as the disease progresses from the onset to acute phase, and tends to decrease chronically
